# Supplementary material for: Carbon dots for tracking and promoting the osteogenic differentiation of mesenchymal stem cells
Source: Royal Society of Chemistry journal article supplement (doi:10.1039/c7bm00358g), 2017-01-01
Supplement: c7bm00358g1.pdf [file c7bm00358g1.pdf]

## **Carbon Dots for Tracking and Promoting Osteogenic**

### **Differentiation of Mesenchymal Stem Cells**

*Dan Shao<sup>†abe</sup>, Mengmeng Lu<sup>†ce</sup>, Duo Xu<sup>†a</sup>, Xiao Zheng<sup>b</sup>, Yue Pan<sup>b</sup>, Yubin Song<sup>d</sup>,  
Jinying Xu<sup>b</sup>, Mingqiang Li<sup>e</sup>, Ming Zhang<sup>b</sup>, Jing Li<sup>b</sup>, Guangfan Chi<sup>\*b</sup>, Li Chen<sup>\*ab</sup> and  
Bai Yang<sup>d</sup>*

<sup>a</sup> School of Nursing, Jilin University, Changchun 130021, China, Changchun 130021, China. E-mail: chen\_lab@163.com

<sup>b</sup> College of Basic Medical Sciences, Jilin University, Changchun 130021, China. E-mail: guangfan130@jlu.edu.cn

<sup>c</sup> Department of Oral Implantology, Affiliated Hospital of Stomatology, Jiangsu Key Laboratory of Oral Disease, Nanjing Medical University, Nanjing, 210029, China

<sup>d</sup> State Key Laboratory of Supramolecular Structure and Materials, College of Chemistry, Jilin University, Changchun, 130012, China

<sup>e</sup> Department of Biomedical Engineering, Columbia University, New York, NY 10027, USA

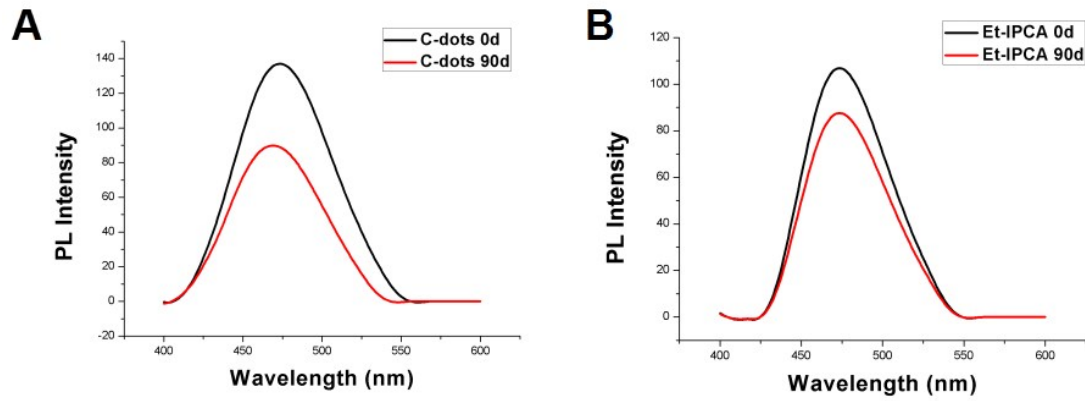

**Figure S1.** PL images and photostability data for the CDs and Et-IPCA stored in DMEM-F12 medium at room temperature for 90 days.

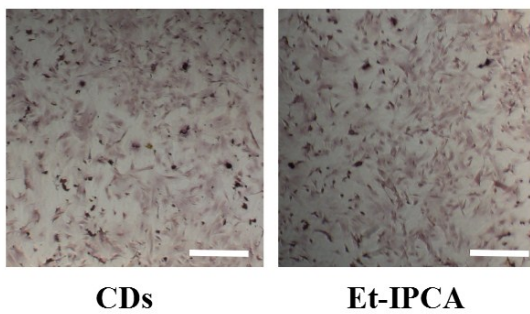

**Figure S2.** Images of osteogenic differentiation visualized by ARS staining after 21 days of incubation with CDs or Et-IPCA in NM.

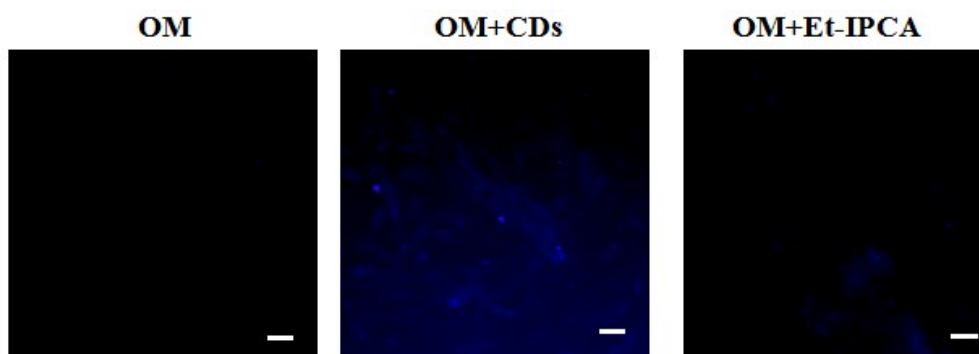

**Figure S3.** Representative fluorescent images from CDs or Et-IPCA labeled rBMSCs during a 21-d induction period. Scale bars represent 10  $\mu$ m.
